# Supplementary material
Source: PubMed Central journal article supplement (PMC8860925)
Supplement: mmc2.pdf [file mmc2.pdf]

**Supplementary table 1: List of flow cytometry and confocal microscopy antibodies**

| <b>Antibody</b>                | <b>Reactivity</b>            | <b>Clone</b> | <b>Dilution</b> | <b>Company</b>                         | <b>Catalogue Number</b> |
|--------------------------------|------------------------------|--------------|-----------------|----------------------------------------|-------------------------|
| Flow cytometry                 |                              |              |                 |                                        |                         |
| CD138 PE-Cyanine7              | mouse                        | 281-2        | 1:400           | Biolegend                              | 142513                  |
| CD185 (CXCR5) FITC             | mouse                        | L138D7       | 1:400           | Biolegend                              | 145520                  |
| CD21/CD35 APC/CY7              | mouse                        | 7E9          | 1:200           | Biolegend                              | 123417                  |
| CD21/CD35 Brilliant Violet 421 | mouse                        | 7E9          | 1:400           | Biolegend                              | 123421                  |
| CD23 PE                        | mouse                        | B3B4         | 1:400           | Thermo Fisher Scientific (eBioscience) | 12-0232-82              |
| CD3 PerCP-eFluor 710           | mouse                        | Ebio500a2    | 1:400           | Thermo Fisher Scientific (eBioscience) | 46-0033-82              |
| CD38 APC/CY7                   | mouse                        | 90           | 1:400           | Biolegend                              | 102727                  |
| CD4 Brilliant Violet 421       | mouse                        | GK1.5        | 1:400           | Biolegend                              | 100437                  |
| CD45R (B220) Alexa Fluor 700   | mouse/human                  | RA3-6B2      | 1:200           | Thermo Fisher Scientific (eBioscience) | 56-0452-82              |
| CD73 APC                       | mouse                        | TY/11.8      | 1:200           | Biolegend                              | 127213                  |
| CD73 Brilliant Violet 605      | mouse                        | TY/11.8      | 1:100           | Biolegend                              | 127215                  |
| CD93 PE-Cyanine7               | mouse                        | AA4.1        | 1:400           | Thermo Fisher Scientific (eBioscience) | 25-5892-82              |
| CD95 Brilliant Violet 421      | mouse                        | Jo2          | 1:200           | BD Biosciences                         | 562633                  |
| FoxP3 Alexa Fluor 700          | Mouse/bovine/dog/cat/pig/rat | FJK-16s      | 1:200           | Thermo Fisher Scientific (eBioscience) | 56-5773-80              |
| GL7                            | Mouse/human                  | GL-7         | 1:100           | Thermo Fisher Scientific (eBioscience) | 53-5902-82              |
| IgD APC                        | mouse                        | 11-26c       | 1:400           | Thermo Fisher Scientific (eBioscience) | 17-5993-82              |
| IgD APC-eFluor 780             | mouse                        | 11-26c       | 1:400           | Thermo Fisher Scientific (eBioscience) | 47-5993-82              |
| IgD PerCP-eFluor 710           | mouse                        | 11-26c       | 1:400           | Thermo Fisher Scientific (eBioscience) | 46-5993-80              |
| IgM APC                        | mouse                        | II/41        | 1:400           | Thermo Fisher Scientific (eBioscience) | 17-5790-82              |
| IgM Brilliant Violet 605       | mouse                        | RMM-1        | 1:100           | Biolegend                              | 406523                  |
| IgM FITC                       | mouse                        | eB121-15F9   | 1:400           | Thermo Fisher Scientific (eBioscience) | 11-5890-85              |
| NP(14) PE (1 mg/ml)            | -                            | -            | 1:50            | ChemCruz                               | sc-396483               |
| Confocal microscopy            |                              |              |                 |                                        |                         |
| B220-eF450                     | Mouse/human                  | RA3-6B2      | 1:100           | Thermo Fisher                          | 48-0452-82              |
| CD23-PE                        | Mouse                        | B3B4         | 1:50            | Thermo Fisher                          | 12-0232-82              |
| CD169 (Siglec-1)-AF647         | Mouse                        | 3D6.112      | 1:100           | BioLegend                              | 142408                  |
